# Supplementary figures and images for: Putting together the puzzle of ion transfer in single-digit carbon nanotubes: mean-field meets ab initio
Source: Royal Society of Chemistry journal article supplement (doi:10.1039/d1nr08073c), 2022-01-01

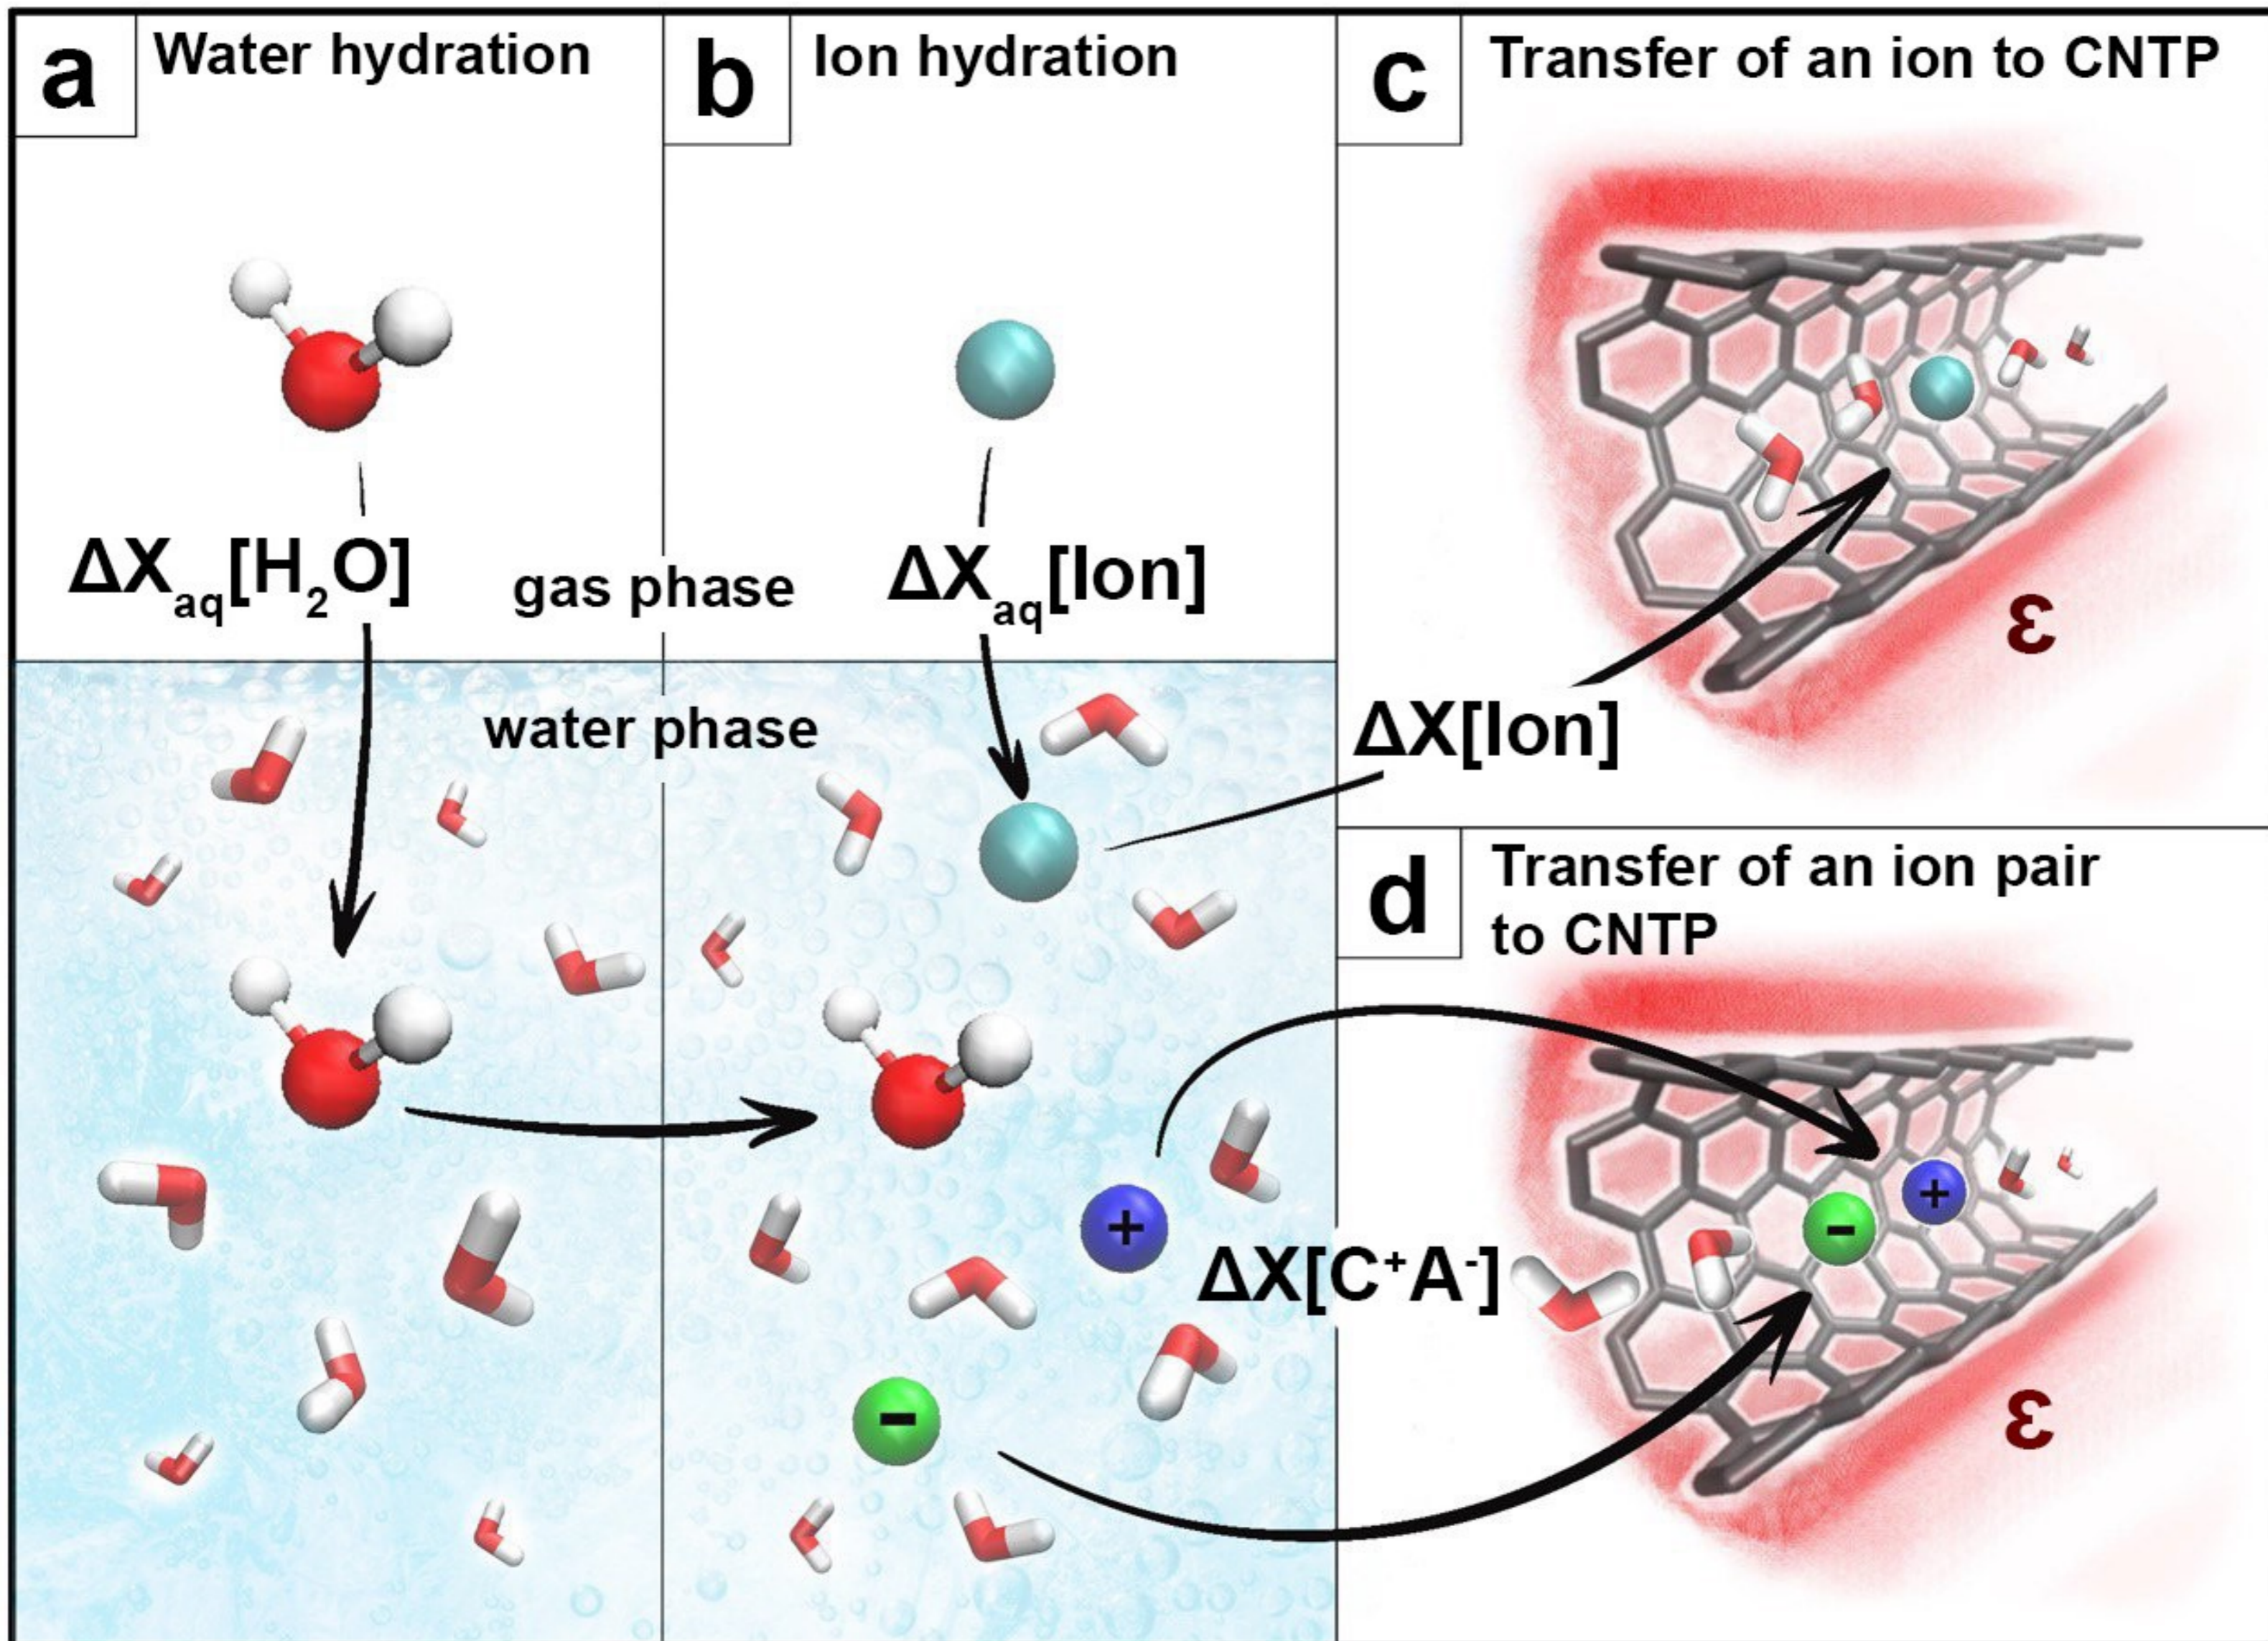

Supplement: d1nr08073c1.pdf [file d1nr08073c1.pdf]

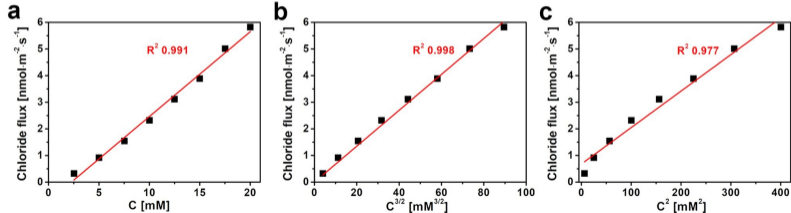

Supplement: d1nr08073c5.pdf [file d1nr08073c5.pdf]
